1 **Response of Soil Microbiome Structure to Biological Control**  
2 **Agents (BCAs) in Strawberry Greenhouse**

3 Senlin Liu<sup>1</sup>, Muzammil Hassan Khan<sup>1</sup>, Zhongyuan Yuan<sup>1</sup>, Sarfraz Hussain<sup>1</sup>, Hui  
4 Cao<sup>1\*</sup>, Yabo Liu<sup>2\*</sup>

5 <sup>1</sup>College of Life Sciences/Key Laboratory of Agricultural Environmental  
6 Microbiology, Ministry of Agriculture and Rural Affairs, Nanjing Agricultural  
7 University, Nanjing 210095, P. R. China

8 <sup>2</sup>Zhenjiang Institute of Agricultural Sciences, Jurong 212400, China

9

10 **\*Author for correspondence:**

11 Prof. Hui Cao, College of Life Sciences/Key Laboratory of Agricultural  
12 Environmental Microbiology, Ministry of Agriculture, Nanjing Agricultural  
13 University, 6 Tongwei Road, Nanjing 210095, Jiangsu, People's Republic of China.

14 Tel: +86 025 84396753; Fax: +86 025 84396753; Email: [hcao@njau.edu.cn](mailto:hcao@njau.edu.cn)

15

16 Yabo Liu: Zhenjiang Institute of Agricultural Sciences, Jurong 212400, China

17 Email: [lyb522718@126.com](mailto:lyb522718@126.com)

18 **Abstract**

19 Continuous cropping always leads to severe abiotic and biotic problems,  
20 especially the high-intensity land utilization in greenhouses, which causes  
21 widespread concern. Effective Microorganisms (EM) and *Bacillus subtilis*  
22 (BS) have been widely used to promote plant growth and increase yields as  
23 biological control agents (BCAs). However, their effects on soil microbes  
24 are obscure. To regulate the microbial community in continuous cropping  
25 strawberry soils, we developed four soil amendments by combining EM and  
26 BS with compost. The amplicon sequencing of bacterial and fungal  
27 ribosomal markers was applied to study the response of the soil microbiome  
28 structure. We noticed a sharp increase in bacterial diversity after the  
29 addition of EM-treated high compost and BS-treated low compost, while  
30 there was no significant change in fungal diversity among treatments.  
31 Interestingly, both the relative abundance and FUNGuild predictions was  
32 consistent in revealing that BCAs may inhibit fungal pathogens in soils.  
33 Correlation analysis indicated that soil microbial community was indirectly  
34 driven by soil properties. Co-occurrence networks demonstrated that BCAs  
35 could be microecologically homogeneous through enhancing bacterial  
36 network complexity and modularity. Collectively, EM-treated high compost  
37 and BS-treated low compost can well regulate the microbial community  
38 structure and thus maintain soil health.

39 **Key words:** Continuous cropping, *Bacillus subtilis*, Strawberry, Plant pathogens,  
40 Microbial community, Co-occurrence networks

## 41 1. Introduction

42 Strawberries (*Fragaria* × *Ananassa*) are world-renowned high-value soft  
43 fruits. China's strawberry cultivation area accounts for 40% of the world's  
44 total in 2016. With a total production of more than \$10 billion, the industry  
45 is one of the major contributors to the national economy [1, 2]. Soil microbes  
46 play essential roles in maintaining soil health and ecosystem function [3].  
47 Long-term monocropping on the same site may cause serious problems [4].  
48 It usually results in a dysfunctional soil microbial community structure,  
49 increased abundance of pathogenic microorganisms, and decreased  
50 abundance of beneficial microorganisms [5, 6]. For instance, over the past  
51 decade, there has been a significant decline in the richness and diversity of  
52 bacterial and fungal communities and a significant increase in the  
53 communities of *Fusarium* in the continuous cropping strawberry fields.  
54 According to recent research, the growing problem of continuous cropping  
55 in strawberry production is prevalent in all regions [3, 7].

56 Soil chemical fungicide is commonly used during cultivation, which  
57 may improve crop yield by killing soil pathogenic microorganisms [8]. By  
58 2018, methyl bromide and anaerobic soil disinfestation (ASD) have blocked  
59 the spread of soil-borne plant pathogens in field settings [9] A field trial  
60 conducted by [10], showed that ASD induces changes in soil microbiome  
61 structure and strawberry disease-causing pathogens, and enhances  
62 commercial strawberry production. However, the fact that the pathogen can  
63 survive in the soil for years makes soil fungicide only partially effective  
64 [11]. Crop rotation is also known to be an option to mitigate soil pathogens.  
65 The increase in yield of corn-soybean rotation is usually attributed to  
66 microbial community in the soil, especially when it comes to disease control  
67 and nutrient availability [12, 13]. However, these traditional methods have  
68 many drawbacks, for instance environmental pollution and high costs.

69 Consequently, we have further to address this problem with more  
70 economical and safety-friendly soil conditioners.

71 In general, beneficial soil microbes can compete with pathogens [13,  
72 14]. Furthermore, these microbes help manage nutrients by making nutrients  
73 available in plants through decomposition, solubilization, iron carrier  
74 production, or symbiosis [15] A series of studies have shown that organic  
75 amendments usually have the most significant effects on microbial  
76 community in agricultural soils, such as compost or manure [16, 17].  
77 Therefore, the use of soil amendments based on biological control agents  
78 (BCAs) and compost is considered to be a sustainable strategy[18, 19].

79 According to the EM Research Organization  
80 ([www.emrojapan.com/how/](http://www.emrojapan.com/how/)), Effective Microorganism (EM) has been  
81 developed in Japan since the 1980s, and it has been confirmed to be  
82 composed of lactic acid bacteria, yeasts, nitrogen-fixing bacteria, and  
83 photosynthetic bacteria [20]. It has been reported that EM could increase the  
84 diversity of soil microbes and control soil diseases, thus contributing to crop  
85 growth [21, 22]. LauraNey's research showed that the combination of EM  
86 and compost could enhance the resistance of soil food webs to drought stress  
87 as well as improving N mineralization from compost manure [23]. The  
88 successful performance of EM depends on appropriate formulation  
89 techniques and ingredients (nutrients, adhesives) for improving its durability  
90 and reliability under current environmental conditions [24]. As another BCA  
91 in soil amendment used, *Bacillus subtilis*, scientists have found that it has a  
92 good inhibition effect on a variety of plant pathogens [25], including  
93 *Verticillium sp*, *Fusarium oxysporum* and *Penicillium digitatum* [26, 27].  
94 Besides, scientists studied the impact of the incorporation of *Bacillus*  
95 *subtilis* on the composition of bacterial and fungal communities in cucumber  
96 and rice rhizosphere. They found that it could be used as a plant protection

97 agent that is compatible with the soil environment, depending on the soil  
98 type [7, 28].

99 Hitherto, numerous studies have focused on the effects of fertilization  
100 and soil management measures, including tillage [29], rotation [30], straw  
101 [31]. Besides, relevant studies on the addition of soil amendments in the  
102 strawberry field mainly gave priority to its pathogenic fungi. In contrast,  
103 there are few studies on the function and co-occurrence network of  
104 strawberry soil microbes [32, 33].

105 In this study, we developed a series of soil amendments by combining  
106 compost with two popular commercial BCAs (EM and BS). A field  
107 experiment was carried out in a long-term continuous cropping strawberry  
108 greenhouse in southern China, and we applied 16S rRNA amplicon  
109 sequencing [34] for further study. We hypothesize that, with soil  
110 amendments processing, the diversity and co-occurrence patterns among  
111 strawberry soil microbiome could be improved ideally. Besides, we assume  
112 that the soil ecological function has predictable heterogeneity. The  
113 objectives of our study are: (1) to regulate the soil microbial community  
114 structure and control soil pathogens in continuous cropping field; and (2) to  
115 put forward a theoretical and practical basis for the sustainable production  
116 of strawberry and other plants from the perspective of microbial ecology.

## 117 **2. Materials and methods**

### 118 2.1. Soil amendments preparation

119 The soil amendments compared were organic compost with two biological  
120 control agents (BCAs): Effective Microorganisms (EM) and *Bacillus subtilis*  
121 (BS). Rice bran and soybean meal were blended clinched alongside a ratio of 1:2 (dry  
122 weight) to serve compost for the processing of soil amendments [35], and the detailed  
123 parameters for compost are provided in the supplement TableThe EM (~1 ×

124  $10^9$ CFU/mL) and BS ( $\sim 1 \times 10^{11}$ CFU/mL), are produced by Jiangsu Warner  
125 Biotechnology Co., Ltd. The main components of EM were *Lactobacillus plantarum*,  
126 *Lactobacillus acidophilus*, *Lactobacillus pentose*, yeast, *Bacillus pumilus*, nitrifying  
127 bacteria and metabolites. The main component of BS is *Bacillus subtilis*. The original  
128 EM agent is of pH 3.5 compared to 7.0 for BS. EM was activated by using 1.0 L  
129 mother culture EM • 1® and mixed with 500 mL unsulfured molasses in bioreactor  
130 under anaerobic conditions [36]. After a week, the activated EM with the pH value  
131 above 4.0 could be accessible, and BS can be used directly. The two sorts of BCAs  
132 were diluted with chlorine-free water at a proportion of 50 times, and the compost  
133 was produced with the application of EM, BS at turning. In order to optimise the  
134 proportion of compost in the soil amendments, we have set two levels of compost  
135 content in each BCA.

136 As stated by those extent for unit zone utilized within greenhouse, four soil  
137 amendments were prepared, which were: (I) EM 1ml/m<sup>2</sup>+compost 125g/m<sup>2</sup> (EM1),  
138 1.05kg per treatment repetition; (II) EM 1mL/m<sup>2</sup>+compost 250g/m<sup>2</sup> (EM2), 1.8kg per  
139 treatment repetition; (III) BS agent 1ml /m<sup>2</sup>+compost 125g/m<sup>2</sup> (BS1), 1.05kg per  
140 treatment repetition; and (IV) BS agent 1ml/m<sup>2</sup>+compost 250g/m<sup>2</sup> (BS2), 1.8kg per  
141 treatment repetition. It is worth noting that EM and BS are calculated based on the  
142 original concentration. Following preparing, the soil amendments were stored and  
143 then utilized within greenhouse experiments.

## 144 2.2. Experimental design and Sampling

145 Our greenhouse experiment and design were carried out in Baitu Town,  
146 Zhenjiang City, Jiangsu Province, China (31° 57' N, 120° 09' E). The region has a  
147 Northern Subtropical climate, with average annual precipitation of 1022 mm and  
148 mean yearly temperature of 17.1°C [1].

149 The plots in the greenhouse are arranged in a randomised block design with three  
150 replications per treatment, and no application of soil amendments as the control. The  
151 specific treatments were control, EM1, EM2, BS1 and BS2, respectively. The  
152 greenhouse area was 10 m wide and 60 m long, which contained five experimental  
153 plots for five treatments, and each plot in the greenhouse is 0.5 m wide and 12 m  
154 long. Strawberries are planted in double rows with 20cm interval, and the soil type is

155 loam according to Soil Classification Retrieval System of China.

156 This greenhouse has been used to plant strawberry for more than 5 consecutive  
157 years prior to this experiment, and we have witnessed a decline in strawberry  
158 production and growth in recent years. As a traditional method of alleviating  
159 continuous cropping pathogens, the greenhouse was closed in July 2018 to make use  
160 of sunlight and weeds were removed in August. Strawberries were transplanted in  
161 September, while soil amendments were introduced to the soil layer and covered with  
162 an agricultural plastic film according to the treatment process detailed in 2.1. Water  
163 was conveyed through drip irrigation and maintained under the same agricultural  
164 management model (Supplementary Fig 1). It was guaranteed the strawberries  
165 cultivated in greenhouse belonged to the same variety (*Benihoppe*).

166 Three single-well soil samples were collected randomly from each treatment plot  
167 as three replicates. greenhouse soils (0 - 20 cm depth) were gathered from the  
168 greenhouse with an S-pattern in December 2018, when the strawberries were in the  
169 fruiting stage. Then afterward collecting the strawberry soil, a total of 15 fresh soil  
170 samples were put in aseptic plastic bags and brought back to the laboratory for storage  
171 at 4°C and -80°C, separately.

### 172 2.3 Analysis of soil physicochemical properties

173 Soil pH (soil:water=1:5, w/v) was determined using a pH meter with a glass  
174 electrode (FE20-Five Easy Plus™, Switzerland) [37]. Total organic C(TOC) was  
175 determined according to the vitriol acid-potassium dichromate oxidation method [38].  
176 Total nitrogen (TN) was measured based on direct combustion using an elemental  
177 analyzer[39]. C/N ratios were measured by the ratio of TOC to TN. Inorganic N  
178 ( $\text{NH}_4^+$ -N and  $\text{NO}_3^-$ -N) of soil was drawn with 2 mol/L KCl (soil:KCl=1:10, w/v) by  
179 shaking (1h, 200rpm) and filtering through polysulfone membrane, before  
180 colorimetric determination requiring a continuous-flow analyzer [40]. Available K  
181 (AK) and total K (TK) of the soil samples were identified using flame photometry  
182 method [41], and available P (AP) was tested by the molybdenum blue method. Soil  
183 physicochemical properties are presented in Supplemental Table 1.

#### 184 2.4. DNA extraction and 16S rRNA and ITS amplicon sequencing

185 In order to ensure the validity of the experiment, the soil was kept in the  
186 refrigerator for only one week before the soil DNA was extracted. The microbial  
187 DNA of fifteen soil samples was extracted from 1.0 g of each sample by the  
188 E.Z.N.A.® Soil DNA Kit (Omega Bio-tek, Norcross, GA, U.S.) conforming to the  
189 manufacturer's instructions. The V3-V4 region of the 16S rRNA gene and the ITS1  
190 region of the fungal ITS gene were selected as specific fragments for detection of  
191 bacteria and fungi using primers 338F/806R [42] and ITS1F/ITS2 [43], respectively.  
192 PCR reactions were performed in triplicate 30  $\mu$ l mixtures containing 10 ng of  
193 template DNA, Phusion® High-Fidelity PCR Master Mix (New England Biolabs) 15  
194  $\mu$ l, 2  $\mu$ mol/L Primer 3  $\mu$ l. The PCR reactions for the 16S V3-V4 rRNA gene were  
195 conducted following the process: initial denaturation under 95°C for 3 min, 30 cycles  
196 consisting of denaturation for 30s at 95°C, annealing at 56°C for 30 s, followed by 72  
197 °C for 45 s, and a final extension for 5 min at 72°C; as for the ITS gene, the following  
198 procedure was followed: an initial denaturation step at 95°C for 3 min, followed by 35  
199 cycles at 94°C for 30 s, 55°C for 30 s and 72°C for 45 s, and finally an extension of 10  
200 min at 72°C [44]. The resulted PCR products were extracted from a 2% agarose gel  
201 and further purified with GeneJET™ Gel Extraction Kit (Thermo Scientific) as  
202 stated by the protocol of manufacturer. The library quality was assessed by the  
203 Qubit® 2.0 Fluorometer (Thermo Scientific).

204 Single-end of 16S rRNA gene and ITS1 sequenced on an Ion S5™ XL platform  
205 (Wang et al., 2018) by Novogene Genomics Institute (Beijing, China). Those raw  
206 reads were deposited into the NCBI Sequence Read Archive (SRA) database  
207 (Accession Number: SUB7456591).

#### 208 2.5. Bioinformatic processing and Analysis

209 The naive-Bayes, BLAST+-based, and VSEARCH-based classifiers  
210 implemented in QIIME (V2.0, <http://qiime.org/>) [45] designed for classification of  
211 bacterial 16S rRNA and fungal ITS marker-gene sequences that were evaluated in this  
212 study. Then, sequences were quality controlled (> 25 score and the length of 200 bp),  
213 and according to the corresponding barcode assigned to different samples. Sequences



214 with  $\geq 97\%$  similarity were assigned to the same operational taxonomic units  
215 ( OTUs ) [46] , then the bacterial OTUs of the representative sequences were  
216 performed by the Silva (Version 132) database (<https://www.arb-silva.de/>) [47]. The  
217 Heatmap, Barchart and correlation analysis (RDA, CCA) were displayed with  
218 R-Studio (Version 3.6). We defined specific OTUs as “abundant” when their average  
219 relative abundances were above 0.05% across all samples following [48]. For the  
220 Mantel test, it focused those soil physicochemical properties that significantly  
221 correlated with abundant OTUs by the Bray-Curtis dissimilarity algorithm. The  
222 differences between treatments were analysed by one-way ANOVA ( $P < 0.05$ ) using  
223 the SPSS 25.0 software.

224 FAPROTAX (version 1.1) [49] was employed to annotate the functional  
225 annotation of bacterial community in the normalized OTU TableFAPROTAX  
226 (<http://mem.rcees.ac.cn:8080/root>) is a manually constructed database that maps  
227 prokaryote to possible ecological functions (nitrification, denitrification or  
228 fermentation) or metabolic. For instance, if all cultured strains of the bacteria have  
229 been identified as nitrification types, FAPROTAX assumes that all uncultured  
230 genera are the same functional group.[50]. Correspondingly, FUNGuild is an  
231 ITS-based functional prediction software launched in 2016, and is currently based on  
232 a classification prediction called 'guild', which is based on data integrated from  
233 published literature [51]. There are 12 categories of pathogenic bacteria, animal  
234 pathogens and wood decay fungi.

## 235 2.6. Co-occurrence network analyses

236 In order to illustrate the co-occurrence interaction between bacteria in strawberry  
237 greenhouses, network analysis was performed on the abundance of the top 80 genera  
238 between treatments. We adopted Spearman’s correlation to obtain the strong  
239 correlation ( $r > | 0.8 |$ ) and significant correlation ( $P < 0.05$ ) between taxa. Next, we  
240 used Cytoscape version 3.8.0 [52] to visualize the network structure. The size of each  
241 node stands for relative abundance of the genus of microbe. The colour of each node  
242 was distinguished depending on the level of phylum. Correlation was shown as an  
243 edge (positive correlation = grey; Negative correlation = red); At the same time,  
244 Gephi (v.0.9.2) and Network Analyzer were utilized to calculate the obtained network  
245 topology parameters(number of nodes and links, network density, shortest paths,

246 network diameter, average neighbors, and clustering coefficient) to represent the  
247 co-occurrence relationship between genera [53].

### 248 **3. Results**

#### 249 3.1. Richness and diversity of bacterial and fungal communities

250 From 15 soil samples, we obtained a total of 1,537,746 high-quality V3-V4  
251 sequences of 16S rRNA and 1,202,670 high quality ITS1 sequences, average read  
252 length of bacteria and fungi were 437 and 282 bp, respectively. The sequences were  
253 grouped into 3888 bacterial operational taxonomic units (OTUs) and 1234 fungal  
254 OTUs at 97% sequence similarity cutoff (Supplementary data 1). For the  $\alpha$ -diversity,  
255 indexes including observed OTUs, Chao1, ACE, Shannon, and Simpson of bacterial  
256 and fungal communities were observed (Supplemental Table 2). All coverage of soil  
257 bacteria and fungi was more than 97.9%, indicating the current sequencing depth in  
258 this study was accurate and reliable. The Shannon index (Fig 1a) showed that the  
259 bacterial diversity of the EM2 and BS1 treatments was significantly higher than that  
260 of the control ( $P < 0.01$ ); the Chao index (Fig 1b) showed that the bacterial richness of  
261 EM1 was significantly lower than that in the control ( $P < 0.05$ ). Conversely, we did  
262 not see significant differences in community richness and soil fungi diversity (Fig 1c,  
263 d).

264 The Venn diagram shows that the distribution of OTUs in the microbial  
265 community varied among the different treatments (Fig 2). A total of 1314 OTUs were  
266 shared among the five soil treatments, accounting for 33.80% of the total. In addition,  
267 311, 57, 90, 107 and 282 OTUs were unique in the control, EM1, EM2, BS1 and BS2  
268 treatments, respectively (Fig 2a). Interestingly, in the same BCA, the number of  
269 bacterial unique OTUs in the higher composts increased significantly. Soil fungi  
270 shared 323 OTUs among the five treatments, accounting for 26.16% of the total  
271 OTUs. In the order of the above soil treatments, there were 129, 45, 25, 66 and 20  
272 unique OTUs for soil fungus, respectively. (Fig 2b). We found a significant reduction  
273 in the number of unique OTUs in compost with the same agent.

### 274 3.2. The core microbiome at genus level

275 According to the taxonomic identification, there were 42 phyla, 50 classes, 114  
276 orders, 223 families, and 570 genera in bacterial community, while fungal OTUs  
277 could be classified into 10 phyla, 29 orders, 62 orders, 101 families and 144 genera.  
278 Nineteen bacterial genera with relative abundance greater than 1% were identified  
279 (Fig 3a), and the most abundant genera are *Rhodanobacter* (8% - 21%) , *Bacillus*  
280 (3% - 8%) , *Arachidicoccus* (1% - 6%) . *Rhodanobacter* (p\_\_Proteobacteria),  
281 *Bacillus*, *Arachidicoccus*, *Thermoflavifilum*, *Sphingomonas* (p\_\_Proteobacteria) ,  
282 *Pseudomonas* (p\_\_Proteobacteria), and *Streptomyces* (p\_\_Proteobacteria). Among  
283 them, there were significant differences among different treatments in phyla  
284 Firmicutes and Bacteroides belonging to Proteobacteria ( $P < 0.05$ ). All four soil  
285 amendment treatments increased the total relative abundance of dominant genera.  
286 Among them, EM1 was the highest (52.2%), and the control greenhouse was the  
287 lowest (15.83%). Compared with the control treatment, the application of EM1, EM2,  
288 and BS2 raised the relative abundance of *Rhodanobacter* and *Arachidicoccus*.  
289 However, there was no significant difference between two compost treatments. At the  
290 same time, EM1, EM2, and BS2 significantly reduced the relative abundance of  
291 *Sphingomonas* in soil. Both BS1 and BS2 treatments significantly advanced the  
292 relative abundance of *Bacillus*. All the four soil amendment treatments remarkably  
293 reduced the relative abundance of *Thermoflavifilum*, with the most significant decline  
294 in EM2.

295 Considering that fungi are key microbes for soil-borne diseases, it is necessary to  
296 focus our attention on them. After a previous classification in the literature, we  
297 identified 9 genera of plant pathogenic fungi in the strawberry continuous cropping  
298 soil (Supplemental Table 3), of which the first 7 genera (including *Aspergillus*,  
299 *Rhizopus* and *Penicillium*, etc.) are dominant genera (Fig 3b) and the remaining 2  
300 genera are rare taxa. The average total abundance of these pathogens was 9.94% (CK),  
301 0.98% (EM1), 8.27% (EM2), 3.60% (BS1) and 0.93% (BS2), respectively. The total  
302 abundance of these pathogenic fungi decreased with the application of the soil  
303 amendments, with EM1, BS2 decreasing the most. Further ANOVA analysis revealed  
304 that the genera *Aspergillus*, *Rhizopus*, *Penicillium*, *Fusarium*, *Alternaria*, *Mucor* and  
305 *Botrytis* differed significantly among different treatments. In particular after the

306 implementation of soil amendments, the relative abundance of *Rhizopus*, *Penicillium*  
307 and *Fusarium* all decreased significantly ( $p < 0.05$ ).

308 3.3 Correlations of abundant microbial taxa with edaphic variables of soil  
309 Characteristics

310 We carried out the correlation analysis using the soil physicochemical properties  
311 as well as the selected abundant OTUs of sequences (Fig 4a). In the entire dataset,  
312 there existed In the whole data set, the abundant taxa contained 159 bacterial OTUs  
313 and 28 fungal OTUs (Purple dots in figure 4). CCA indicated that 54.43% of the total  
314 variance within abundant bacterial taxa was explained by the first (29.79%) and  
315 second (24.633%) ordination axes (Fig 4a). The variation in bacterial composition  
316 was significantly explained by TN, AP, AK and C/N ratios. The EM2, BS1 treated  
317 samples occupied a richer bacterial community, which is consistent with the previous  
318 findings. The richer bacterial taxa in the EM1 treated samples were closest to TN, AP,  
319 AK, and they correlated well with each other. For the fungal community (Fig 4b),  
320 RDA indicated that 82.293% of the total variance within abundant bacterial taxa was  
321 explained two ordination axes. There is a clear distinction between the different  
322 treatments. However, the correlation between the abundant fungal taxa in the different  
323 treated soils and soil physicochemical properties was weak.

324 Mantel test (Supplementary Table 4) revealed significant ( $P \leq$  values based on  
325 999 permutations) relationships between bacterial abundant community and TN, AP,  
326 AK and C/N ratios. On the other hand, there were significant relationships between  
327 fungal abundance communities and the presence of AP and TK only.

328 3.4. Potential roles of key microbial players in the strawberry soil with amendments

329 The FAPROTAX database has been extensively used to analyse the  
330 biogeochemical cycling processes of bacterial communities. We assigned 768 out of  
331 3,863 bacterial OTUs (19.9%) to at least one microbial functional group. Sixty-seven  
332 predicted functions were identified. Then the most abundant 25 functional groups  
333 were further evaluated for their relative profiles in the different soil samples (Fig 5a).  
334 Chemoheterotrophy and aerobic\_chemoheterotrophy were the two highest relative

335 abundance in different treatments among the putative functions , accounting for  
336 15.55% and 14.90% of the total respectively. Many functional groups in the soil were  
337 more abundant after BS1, BS2 treatment and were reduced after EM1, EM2 treatment.  
338 Among them, BS2 application significantly lowered the relative abundance of  
339 chemoheterotrophy, aerobic\_chemoheterotrophy function. Whereas EM1, EM2  
340 application remarkably reduced nitrogen\_respiration and nitrate\_respiration function.  
341 After the four soil amendments applications, there was a significant decline in the  
342 function of predatory\_or\_exoparasitic, invertebrate\_parasites.

343 The function of fungal microbial community was predicted by FUNGuild. A  
344 total of 825 OTUs were classified into fungal guilds, accounting for 66.86% of all  
345 OTUs. As shown in Fig 5b, Unassigned and Undefined\_Saprotroph functional groups  
346 of fungi dominate the top 25 functional guilds, with average abundances of 54.27%  
347 and 40.45% respectively, while other functions are less predominant (about 6%). All  
348 soil amendments significantly reduced Plant\_Pathogen, Animal\_Pathogen and  
349 Soil\_Saprotroph functional fungi. Specifically, for the latter two functions, soil  
350 amendments with BS was more significant than with EM applications.

### 351 3.5. Structure and composition of bacterial co-occurrence networks

352 Co-occurrence network analysis was conducted to assess the complexity of the  
353 interactions among bacterial genera detected in strawberry soils treated with different  
354 amendments. Spearman was used to calculate the correlation between the top 80  
355 bacterial genera in the soil. Then, we selected the Cytoscape software to visualize the  
356 co-occurrence network (Fig 6) and evaluate several vital topological properties  
357 (Table1).

358 The bacterial network was composed of nodes and edges, and there were 70-74  
359 nodes with significant correlations. The results showed that nodes, total links, positive  
360 links, negative links, network density, network diameter and average neighbors all  
361 increased after the addition of soil amendments. We easily found that the bacterial  
362 network of EM2 was the most complex and compact, and it held the highest  
363 topological properties of total links (216) and network density (0.080); however, the

364 simplest network (control) was only 139 and 0.058, respectively. Moreover, total  
365 bacterial links and network diameter in soil amendment with EM, were all larger than  
366 with BS, and had greater network complexity. Compared with EM1, the soil bacterial  
367 network was more balanced with EM added compost (positive links are more similar  
368 to negative links). Compared with BS1, positive links of soil bacteria in BS2  
369 increased greatly, while negative links decreased.

370 Utilizing the degree of connectivity between microbes, we sought to find the  
371 keystone genera within each network. The higher the degree index, the closer the  
372 relationship between the genus and other taxa. The degree value of *Gaiella*  
373 (p\_\_Acidobacteria), *Rhodoplanes* (p\_\_Proteobacteria) and *Steroidobacter*  
374 (p\_\_Proteobacteria) in control soil were the highest, but they were all lower than those  
375 in other soil amendments. In EM1 soil, the degree values of *Lysobacter*  
376 (p\_\_Proteobacteria), *Aquicella* (p\_\_Proteobacteria) and *Rhodoplanes*  
377 (p\_\_Proteobacteria) were the highest. In EM2 soil, the degree values of, *Alsobacter*  
378 (p\_\_Proteobacteria), *Pseudoxanthomonas* (p\_\_Proteobacteria) and *Enhydrobacter*  
379 (p\_\_Proteobacteria), *Flavobacterium* (p\_\_Bacteroidetes), *Rhodanobacter*  
380 (p\_\_Proteobacteria) were the greatest, and it was noted that the relative abundance of  
381 *Rhodanobacter* was also the richest in the community. In BS1 soil, the degree values  
382 of, *Patricia* (p\_\_Bacteroidetes) and *Flavobacterium* (p\_\_Bacteroidetes), *Shimazuella*  
383 (p\_\_Firmicutes) were the highest. In BS2 soil, the genera with the highest degree  
384 were *Mizugakiibacter* (p\_\_Proteobacteria) and *Actinomadura* (p\_\_Actinobacteria),  
385 *Chitinophaga* (p\_\_Bacteroidetes).

#### 386 4. Discussion

387 In this study, by using amendments synthesized by BCAs and compost, we have  
388 revealed details of the soil bacterial and fungal community structure through  
389 high-throughput sequencing. The diversity of microbial community is an indicator of  
390 the effectiveness of agricultural practices [54]. Although the succession pattern of  
391 bacteria and fungi in continuous cropping strawberry fields remains unclear, the  
392 degradation of soil can be partly explained by changes in the diversity and structure of  
393 the microbial community. Some researchers found that the richness and diversity of  
394 bacterial and fungal community would be greatly reduced with the increase of  
395 continuous cropping years (especially over five years) [44]. By adopting different soil

396 amendments, EM2 and BS1 could promote bacterial diversity, while EM1 can  
397 significantly reduce soil bacterial richness. In addition, the alpha-diversity indices of  
398 soil fungal community did not change significantly among treatments. Previous  
399 studies have shown that EM application improved soil microbial diversity [55, 56].  
400 This is similar to the results of the EM2 treatment in our study. It may be due to the  
401 fact that EM bacterial agent is suitable for a higher proportion of compost, and the  
402 number of unique OTUs of bacteria with higher compost increased significantly in the  
403 same BCAs (Fig 2a). Recent studies have shown that the application of BCAs of  
404 *Bacillus*-based formulates does not decreased the total microbial diversity and  
405 community [57]. Instead, *Bacillus subtilis* increased the bacterial diversity in tobacco  
406 rhizosphere soil [58], which is also verified by our findings.

407 The structures of microbial community have undergone profound changes.  
408 Proteobacteria were the most abundant bacteria associated with disease inhibition in  
409 the soil with long-term monostrophic fertilization [6]. In our study, most of the  
410 dominant bacteria with significant differences ( $P < 0.05$ ) belong to Proteobacteria  
411 whose abundance increased to different degrees after adding soil amendments. This  
412 may be one of the factors that guarantee strawberry soil health. We illustrated that  
413 when soil amendments were introduced, the total relative abundance of dominant  
414 bacterial genera increases significantly from 15.83% (control) to 52.2% (EM1).  
415 However, among the genera of soil fungi (Supplemental Table 3), the total relative  
416 abundance of seven pathogens decreased with the application of soil amendments,  
417 with the greatest decrease in EM1, BS2. The relative abundance of *Fusarium*, the  
418 most well-known of the soil and plant pathogens, decreased significantly ( $p < 0.05$ )  
419 after adding soil amendments. Previous studies have shown that the application of  
420 BCAs and certain organic matter can effectively inhibit soil pathogens, including  
421 *Verticillium* sp, *Fusarium oxysporum* and *Penicillium digitatum* [59, 60]. Besides, it  
422 has been shown that *Bacillus* and *Trichoderma* (components of EM) can protect host  
423 plants against pathogens [61, 62]. In this study, the relative abundance of the  
424 corresponding microbial population (especially *Bacillus*) was significantly increased  
425 by adopting BS-based soil amendments. This suggests that soil amendments may  
426 lead to increased competition for resources and antagonistic between bacteria and  
427 pathogens in composting soils. Therefore, through positive interaction, the indigenous  
428 microbial population benefits from introducing microbes into soil systems.

429 The microbial community consists of a large number of abundant and rare taxa.  
430 In most ecosystems, the abundance of microbes contributes to microbial biomass and  
431 mineralization of organic matter [63]. In agricultural soils, microbial communities are  
432 affected by multiple factors such as sampling time, carbon and nitrogen sources, soil  
433 water content and plant physiological status [64]. These factors may be related to  
434 microbial community assembly. Both the dominant bacterial and fungal taxa were  
435 explained by environmental factor correlation analysis, indicating their high  
436 correlation with key soil physicochemical properties. Consistent with other results,  
437 our results showed that EM2, BS1 treatments occupied a richer bacterial community,  
438 and there is significant correlation between the bacterial community and TN, AP, AK  
439 and C/N ratios, whereas the fungal community was only significantly correlated with  
440 AP and TK. Thus, the application of four soil amendments reconstructed soil  
441 microbial communities through changes in soil physicochemical properties.

442 Studies have shown that green manure of soybean promoted the increase of  
443 functional bacteria like nitrogen-fixing bacteria, nitrifying bacteria and denitrifying  
444 bacteria in soil, indicating that green fertilizer application promoted the nitrogen  
445 fixation and nitrogen cycle process in soil [50, 65]. Based on FAPROTAX function  
446 prediction, we estimated that the BS-based soil amendments promoted multiple  
447 functions of soil bacteria, such as the aerobic nitrite oxidation, nitrification and  
448 cellulolysis. Nevertheless, the EM-based soil amendments significantly reduced  
449 multiple functions of soil bacteria. Accordingly, FUNGuild prediction showed that  
450 soil amendments significantly reduced the taxa of Plant\_Pathogen, Animal\_Pathogen  
451 and Soil\_Saprotroph functional fungi, especially the decrease of plant\_pathogenic  
452 functions matched the decrease of these fungal pathogenic taxa shown in table 1  
453 above. Consistently, BS containing soil amendments showed more significant  
454 inhibition against these harmful pathogens than EM-containing soil amendments.

455 Further analysis of the co-occurrence network of 80 dominant genera in soil  
456 microbial community showed that the interaction among bacteria in strawberry soil  
457 after applying soil amendments was more complicated than that in the control soil. In  
458 addition, the total bacterial links of EM (EM1, EM2) were higher than those of BS  
459 (BS1, BS2). The bacterial network of EM2-treated soils was the most balanced and  
460 complex. Based on these results, we assumed that the application of EM and more  
461 compost in strawberry soils made bacterial communities more complex and modular,  
462 which made it easier for specific bacteria to establish symbiotes in agricultural soils



463 [66]. According to this hypothesis, the colonization rate of relatively single flora in  
464 BS-treated soil was lower than that of mixed flora EM, which maintained the health  
465 and balance of soil microbes weakly. In the bacterial network of different treatments,  
466 the keystone genera have undergone significant changes, but they all generally belong  
467 to Proteobacteria and Bacteroidetes. We observed that positive interactions between  
468 nodes indicated niche overlap, while negative interactions indicated competition or  
469 variation [67]. In this study, phylogenetically related microorganisms forms  
470 well-differentiated clusters (Fig6), and clusters with close correlations among key  
471 genera was mainly composed of positive correlation. These results are similar to the  
472 co-occurrence network of natural and agricultural soils [66]. In the bacterial network  
473 of EM-treated soil, the number of keystone genera and clusters were generally greater  
474 than other treatments. In BS treatment, despite a substantial increase in relative  
475 abundance of *Bacillus*, it did not become a keystone genus in the microbial network,  
476 which further confirmed the previous hypothesis. However, whether these clusters  
477 constructed around key genera represent different functional groups remains obscure.

478 However, the ecological effects of these soil amendments on strawberry  
479 cultivation needs a comprehensive evaluation, including the determination of  
480 strawberry growth, production and quality in different treatments, and even its  
481 long-term effects [10, 68]. At the same time, we will consider the response of a  
482 broader range of soils with different physicochemical properties, climate types and  
483 field management practices to soil amendments [7, 69]. EM and BS based studies  
484 have revealed the effects of soil amendments on bacterial community structure and  
485 symbiotic network in strawberry soil. However, the molecular mechanism, phenotypic  
486 characteristics, and interactions behind these changes and their effects on plant health  
487 remain unclear. Therefore, the q-PCR technique should be used to study how the  
488 absolute number of target microorganisms react to soil amendments in agricultural  
489 soils. Further metagenomic studies are needed to the accurate determine the beneficial  
490 bacteria and pathogens at species level.

## 491 **5. Conclusion**

492 In summary, our research showed that EM2/BS1-treated soil amendments  
493 significantly increased bacterial diversity, whereas they had no significant effect on  
494 fungal diversity. The effect of the four soil amendments on soil microbiome structure  
495 was significant, as all of them reduced the relative abundance of fungal pathogens

496 including *Rhizopus*, *Penicillium* and *Fusarium*. FUNGuild predicted that soil  
497 amendments significantly reduced some detrimental functions of soil microhabitat  
498 systems (Plant\_Pathogen, Animal\_Pathogen). Besides, the effects of soil amendments  
499 on soil microbial community are mainly indirectly driven by TK, AP and TN,  
500 suggesting that the application of soil amendments could have an indirect effect on  
501 the soil microbial community by changing environmental factors. Moreover, all soil  
502 amendments enhanced the connectivity of bacterial networks, which was the most  
503 complex and balanced in EM2-treated soils. Therefore, EM2 and BS1, as novel soil  
504 amendments, have the potential to regulate soil microbial community and promote  
505 agricultural sustainable development.

#### 506 **Author contributions**

507 HC, YBL and SLL designed experiments; SLL, MHK, SH, ZYY and YBL carried out  
508 experiments; SLL and SH contributed to the preparation of the manuscript and data  
509 analyses. HC and YBL supervised the entire study.

#### 510 **Declaration of competing interest**

511 The authors declare that they have no known competing financial interests or personal  
512 relationships that could inappropriately influence the work reported in this paper.

#### 513 **Acknowledgments**

514 This research was supported by the National Natural Science Foundation of China  
515 (grant no. 41371262). Meanwhile, we thank the Zhenjiang Institute of Agricultural  
516 Sciences for assistance in conduct of strawberry greenhouse trials. We thank  
517 Novogene Genomics Institute (Beijing, China) for assistance in bioinformatics  
518 analysis.

#### 519 **Reference**

- 520 1. Yang Q, Bao Z, Fu Y, She N, Deng Z, editors. Diagnostic analysis of  
521 waterlogging in Zhenjiang City by using PCSWMM. IOP Conference Series: Earth  
522 and Environmental Science; 2019: IOP Publishing.
- 523 2. Murphy BR, Soldi E, Jadwiszczak MJ, Hodkinson TR. Synergy between fungal  
524 endophytes improves fruit production in strawberry cultivar. Emergent Life Sciences  
525 Research. 2019;5:29-41.
- 526 3. Huang Y, Xiao X, Huang H, Jing J, Zhao H, Wang L, et al. Contrasting beneficial  
527 and pathogenic microbial communities across consecutive cropping fields of

- 528 greenhouse strawberry. *Applied microbiology and biotechnology*.  
529 2018;102(13):5717-29.
- 530 4. Fuentes M, Govaerts B, De León F, Hidalgo C, Dendooven L, Sayre KD, et al.  
531 Fourteen years of applying zero and conventional tillage, crop rotation and residue  
532 management systems and its effect on physical and chemical soil quality. *European*  
533 *Journal of Agronomy*. 2009;30(3):228-37.
- 534 5. Zhou X, Wu F. Dynamics of the diversity of fungal and *Fusarium* communities  
535 during continuous cropping of cucumber in the greenhouse. *FEMS microbiology*  
536 *ecology*. 2012;80(2):469-78.
- 537 6. Liu W, Wang Q, Wang B, Wang X, Franks AE, Teng Y, et al. Changes in the  
538 abundance and structure of bacterial communities under long-term fertilization  
539 treatments in a peanut monocropping system. *Plant and soil*. 2015;395(1-2):415-27.
- 540 7. Li L, Ma J, Ibekwe AM, Wang Q, Yang C-H. Influence of *Bacillus subtilis*  
541 B068150 on cucumber rhizosphere microbial composition as a plant protective agent.  
542 *Plant and Soil*. 2018;429(1-2):519-31.
- 543 8. Benlioğlu S, Boz Ö, Yildiz A, Kaşkavalci G, Benlioğlu K. Alternative soil  
544 solarization treatments for the control of soil-borne diseases and weeds of strawberry  
545 in the Western Anatolia of Turkey. *Journal of Phytopathology*. 2005;153(7-8):423-30.
- 546 9. Shennan C, Muramoto J, Koike S, Baird G, Fennimore S, Samtani J, et al.  
547 Anaerobic soil disinfestation is an alternative to soil fumigation for control of some  
548 soilborne pathogens in strawberry production. *Plant pathology*. 2018;67(1):51-66.
- 549 10. Mazzola M, Muramoto J, Shennan C. Anaerobic disinfestation induced changes  
550 to the soil microbiome, disease incidence and strawberry fruit yields in California  
551 field trials. *Applied Soil Ecology*. 2018;127:74-86.
- 552 11. Gilardi G, Gullino M, Garibaldi A. Soil disinfestation with dimethyl disulfide for  
553 management of *Fusarium* wilt on lettuce in Italy. *Journal of plant diseases and*  
554 *protection*. 2017;124(4):361-70.
- 555 12. Marburger DA, Conley SP, Esker PD, Lauer JG, Ané JM. Yield response to  
556 crop/genotype rotations and fungicide use to manage *Fusarium*-related diseases. *Crop*  
557 *Science*. 2015;55(2):889-98.
- 558 13. Peralta AL, Sun Y, McDaniel MD, Lennon JT. Crop rotational diversity increases  
559 disease suppressive capacity of soil microbiomes. *Ecosphere*. 2018;9(5):e02235.
- 560 14. Müller DB, Vogel C, Bai Y, Vorholt JA. The plant microbiota: systems-level  
561 insights and perspectives. *Annual review of genetics*. 2016;50:211-34.
- 562 15. Chamberlain LA, Bolton ML, Cox MS, Suen G, Conley SP, Ané J-M. Crop  
563 rotation, but not cover crops, influenced soil bacterial community composition in a  
564 corn-soybean system in southern Wisconsin. *Applied Soil Ecology*. 2020;154:103603.
- 565 16. Ashworth A, DeBruyn J, Allen F, Radosevich M, Owens P. Microbial  
566 community structure is affected by cropping sequences and poultry litter under  
567 long-term no-tillage. *Soil Biology and Biochemistry*. 2017;114:210-9.

- 568 17. Nair A, Ngouajio M. Soil microbial biomass, functional microbial diversity, and  
569 nematode community structure as affected by cover crops and compost in an organic  
570 vegetable production system. *Applied Soil Ecology*. 2012;58:45-55.
- 571 18. Bonanomi G, Antignani V, Pane C, Scala F. Suppression of soilborne fungal  
572 diseases with organic amendments. *Journal of Plant Pathology*. 2007:311-24.
- 573 19. Pugliese M, Gilardi G, Garibaldi A, Gullino ML. Organic amendments and soil  
574 suppressiveness: results with vegetable and ornamental crops. *Organic amendments  
575 and soil suppressiveness in plant disease management*: Springer; 2015. p. 495-509.
- 576 20. ALLAHVERDIEV SR, MINKOVA NO, Viktorivich D. The Silent Heroes:  
577 Effective Microorganisms. *İ Ç İ NDEK İ LER*. 2014:24.
- 578 21. Higa T, editor *Kyusei nature farming and environmental management through  
579 effective microorganisms—the past, present and future*. Seventh International  
580 Conference on Kyusei Nature Farming, Christchurch, New Zealand; 2003.
- 581 22. Ney L, Franklin D, Mahmud K, Cabrera M, Hancock D, Habteselassie M, et al.  
582 Examining trophic-level nematode community structure and nitrogen mineralization  
583 to assess local effective microorganisms' role in nitrogen availability of swine  
584 effluent to forage crops. *Applied Soil Ecology*. 2018;130:209-18.
- 585 23. Ney L, Franklin D, Mahmud K, Cabrera M, Hancock D, Habteselassie M, et al.  
586 Impact of inoculation with local effective microorganisms on soil nitrogen cycling  
587 and legume productivity using composted broiler litter. *Applied Soil Ecology*.  
588 2020;154:103567.
- 589 24. Olle M, Williams I. Effective microorganisms and their influence on vegetable  
590 production—a review. *The Journal of Horticultural Science and Biotechnology*.  
591 2013;88(4):380-6.
- 592 25. Solanki MK, Kumar S, Pandey AK, Srivastava S, Singh RK, Kashyap PL, et al.  
593 Diversity and antagonistic potential of *Bacillus* spp. associated to the rhizosphere of  
594 tomato for the management of *Rhizoctonia solani*. *Biocontrol Science and  
595 Technology*. 2012;22(2):203-17.
- 596 26. Ge B, Liu B, Nwet TT, Zhao W, Shi L, Zhang K. *Bacillus methylotrophicus*  
597 strain NKG-1, isolated from Changbai Mountain, China, has potential applications as  
598 a biofertilizer or biocontrol agent. *PloS one*. 2016;11(11):e0166079.
- 599 27. Joshi S, Bharucha C, Desai AJ. Production of biosurfactant and antifungal  
600 compound by fermented food isolate *Bacillus subtilis* 20B. *Bioresource technology*.  
601 2008;99(11):4603-8.
- 602 28. Tokpah DP, Li H, Wang L, Liu X, Mulbah QS, Liu H. An assessment system for  
603 screening effective bacteria as biological control agents against *Magnaporthe grisea*  
604 on rice. *Biological Control*. 2016;103:21-9.
- 605 29. Hartmann M, Frey B, Mayer J, Mäder P, Widmer F. Distinct soil microbial  
606 diversity under long-term organic and conventional farming. *The ISME journal*.  
607 2015;9(5):1177-94.
- 608 30. Venter ZS, Jacobs K, Hawkins H-J. The impact of crop rotation on soil microbial  
609 diversity: A meta-analysis. *Pedobiologia*. 2016;59(4):215-23.

- 610 31. Chen L, Zhang J, Zhao B, Yan P, Zhou G, Xin X. Effects of straw amendment  
611 and moisture on microbial communities in Chinese fluvo-aquic soil. *Journal of soils*  
612 *and sediments*. 2014;14(11):1829-40.
- 613 32. Mirmajlessi S, Bahram M, Mänd M, Najdabbasi N, Mansouripour S, Loit E.  
614 Survey of soil fungal communities in strawberry fields by Illumina amplicon  
615 sequencing. *Eurasian Soil Science*. 2018;51(6):682-91.
- 616 33. Weber RW, Hahn M. Grey mould disease of strawberry in northern Germany:  
617 causal agents, fungicide resistance and management strategies. *Applied microbiology*  
618 *and biotechnology*. 2019;103(4):1589-97.
- 619 34. Metzker ML. Sequencing technologies—the next generation. *Nature reviews*  
620 *genetics*. 2010;11(1):31-46.
- 621 35. Zhiqiang Y, Yongqing X, Fenglan L, Dan L, Lanbao H, Mingjing W, et al.  
622 Effects of Composting Mulch and Organic Fertilizer Fermented by EM on Cucumber  
623 Quality. *Crops*. 2015;(3):24.
- 624 36. Mtolera I, Dongli S. Effect of effective microorganism and gypsum amendments  
625 on nutrient leaching, pH, electrical conductivity, and Okra growth parameters under  
626 coastal saline soil. *Communications in Soil Science and Plant Analysis*.  
627 2018;49(18):2327-37.
- 628 37. Qiu M, Zhang R, Xue C, Zhang S, Li S, Zhang N, et al. Application of  
629 bio-organic fertilizer can control *Fusarium* wilt of cucumber plants by regulating  
630 microbial community of rhizosphere soil. *Biology and Fertility of Soils*.  
631 2012;48(7):807-16.
- 632 38. Nelson DW, Sommers LE. Total carbon, organic carbon, and organic matter.  
633 *Methods of soil analysis: Part 3 Chemical methods*. 1996;5:961-1010.
- 634 39. Sparks DL, Page A, Helmke P, Loeppert RH. *Methods of soil analysis, part 3:*  
635 *Chemical methods*: John Wiley & Sons; 2020.
- 636 40. Wyngaard N, Franklin DH, Habteselassie MY, Mundepi A, Cabrera ML. Legacy  
637 effect of fertilization and tillage systems on nitrogen mineralization and microbial  
638 communities. *Soil Science Society of America Journal*. 2016;80(5):1262-71.
- 639 41. Sartori F, Wade TL, Sericano JL, Mohanty BP, Smith KA. Polycyclic aromatic  
640 hydrocarbons in soil of the Canadian River floodplain in Oklahoma. *Journal of*  
641 *environmental quality*. 2010;39(2):568-79.
- 642 42. Xu N, Tan G, Wang H, Gai X. Effect of biochar additions to soil on nitrogen  
643 leaching, microbial biomass and bacterial community structure. *European Journal of*  
644 *Soil Biology*. 2016;74:1-8.
- 645 43. Taylor DL, Walters WA, Lennon NJ, Bochicchio J, Krohn A, Caporaso JG, et al.  
646 Accurate estimation of fungal diversity and abundance through improved  
647 lineage-specific primers optimized for Illumina amplicon sequencing. *Applied and*  
648 *Environmental Microbiology*. 2016;82(24):7217-26.
- 649 44. Li S, Wu F. Diversity and co-occurrence patterns of soil bacterial and fungal  
650 communities in seven intercropping systems. *Frontiers in microbiology*. 2018;9:1521.

- 651 45. Bolyen E, Rideout JR, Dillon MR, Bokulich NA, Abnet C, Al-Ghalith GA, et al.  
652 QIIME 2: Reproducible, interactive, scalable, and extensible microbiome data science.  
653 PeerJ Preprints, 2018 2167-9843.
- 654 46. Reeder J, Knight R. Rapidly denoising pyrosequencing amplicon reads by  
655 exploiting rank-abundance distributions. *Nature methods*. 2010;7(9):668-9.
- 656 47. Quast C, Pruesse E, Yilmaz P, Gerken J, Schweer T, Yarza P, et al. The SILVA  
657 ribosomal RNA gene database project: improved data processing and web-based tools.  
658 *Nucleic acids research*. 2012;41(D1):D590-D6.
- 659 48. Jiao S, Chen W, Wei G. Biogeography and ecological diversity patterns of rare  
660 and abundant bacteria in oil-contaminated soils. *Molecular ecology*.  
661 2017;26(19):5305-17.
- 662 49. Louca S, Parfrey LW, Doebeli M. Decoupling function and taxonomy in the  
663 global ocean microbiome. *Science*. 2016;353(6305):1272-7.
- 664 50. Yang Z, Xiao X, Zhang Y. Microbial diversity of sediments from an inactive  
665 hydrothermal vent field, Southwest Indian Ridge. *Marine Life Science & Technology*.  
666 2020;2(1):73-86.
- 667 51. Nguyen NH, Song Z, Bates ST, Branco S, Tedersoo L, Menke J, et al. FUNGuild:  
668 an open annotation tool for parsing fungal community datasets by ecological guild.  
669 *Fungal Ecology*. 2016;20:241-8.
- 670 52. !!! INVALID CITATION !!! (Shannon et al., 2003, Pérez-Jaramillo et al., 2019).
- 671 53. Chandran U, Patwardhan B. Network ethnopharmacological evaluation of the  
672 immunomodulatory activity of *Withania somnifera*. *Journal of ethnopharmacology*.  
673 2017;197:250-6.
- 674 54. Wang Y-S, Huang Y-J, Chen W-C, Yen J-H. Effect of carbendazim and  
675 pencycuron on soil bacterial community. *Journal of Hazardous Materials*.  
676 2009;172(1):84-91.
- 677 55. Namsivayam SKR, Narendrakumar G, Kumar JA. Evaluation of Effective  
678 Microorganism (EM) for treatment of domestic sewage. *Journal of Experimental*  
679 *Sciences*. 2011.
- 680 56. Kleiber T, Starzyk J, Gorski R, Sobieralski K, Siwulski M, Rempulska A, et al.  
681 The studies on applying of Effective Microorganisms (EM) and CRF on nutrient  
682 contents in leaves and yielding of tomato. *Acta Scientiarum Polonorum-Hortorum*  
683 *Cultus*. 2014;13(1):79-90.
- 684 57. Cucu MA, Gilardi G, Pugliese M, Matić S, Gisi U, Gullino M, et al. Influence of  
685 different biological control agents and compost on total and nitrification-driven  
686 microbial communities at rhizosphere and soil level in a lettuce-*Fusarium oxysporum*  
687 f. sp. *lactucae* pathosystem. *Journal of applied microbiology*. 2019;126(3):905-18.
- 688 58. You C, Zhang C, Kong F, Feng C, Wang J. Comparison of the effects of  
689 biocontrol agent *Bacillus subtilis* and fungicide metalaxyl–mancozeb on bacterial  
690 communities in tobacco rhizospheric soil. *Ecological engineering*. 2016;91:119-25.

- 691 59. Ling N, Xue C, Huang Q, Yang X, Xu Y, Shen Q. Development of a mode of  
692 application of bioorganic fertilizer for improving the biocontrol efficacy to Fusarium  
693 wilt. *Biocontrol*. 2010;55(5):673-83.
- 694 60. Cao Y, Zhang Z, Ling N, Yuan Y, Zheng X, Shen B, et al. *Bacillus subtilis* SQR  
695 9 can control Fusarium wilt in cucumber by colonizing plant roots. *Biology and*  
696 *fertility of soils*. 2011;47(5):495-506.
- 697 61. Zhang N, Wu K, He X, Li S-q, Zhang Z-h, Shen B, et al. A new bioorganic  
698 fertilizer can effectively control banana wilt by strong colonization with *Bacillus*  
699 *subtilis* N11. *Plant and soil*. 2011;344(1-2):87-97.
- 700 62. Yuan S, Wang L, Wu K, Shi J, Wang M, Yang X, et al. Evaluation of  
701 *Bacillus*-fortified organic fertilizer for controlling tobacco bacterial wilt in greenhouse  
702 and field experiments. *Applied soil ecology*. 2014;75:86-94.
- 703 63. Mo Y, Zhang W, Yang J, Lin Y, Yu Z, Lin S. Biogeographic patterns of abundant  
704 and rare bacterioplankton in three subtropical bays resulting from selective and  
705 neutral processes. *The ISME journal*. 2018;12(9):2198-210.
- 706 64. Berg G, Smalla K. Plant species and soil type cooperatively shape the structure  
707 and function of microbial communities in the rhizosphere. *FEMS microbiology*  
708 *ecology*. 2009;68(1):1-13.
- 709 65. Galand PE, Pereira O, Hochart C, Auguet JC, Debroas D. A strong link between  
710 marine microbial community composition and function challenges the idea of  
711 functional redundancy. *The ISME journal*. 2018;12(10):2470-8.
- 712 66. Pérez-Jaramillo JE, de Hollander M, Ramírez CA, Mendes R, Raaijmakers JM,  
713 Carrión VJ. Deciphering rhizosphere microbiome assembly of wild and modern  
714 common bean (*Phaseolus vulgaris*) in native and agricultural soils from Colombia.  
715 *Microbiome*. 2019;7(1):1-16.
- 716 67. Faust K, Raes J. Microbial interactions: from networks to models. *Nature*  
717 *Reviews Microbiology*. 2012;10(8):538-50.
- 718 68. Hou J, Li M, Mao X, Hao Y, Ding J, Liu D, et al. Response of microbial  
719 community of organic-matter-impooverished arable soil to long-term application of  
720 soil conditioner derived from dynamic rapid fermentation of food waste. *PloS one*.  
721 2017;12(4):e0175715.
- 722 69. Qian X, Li H, Wang Y, Wu B, Wu M, Chen L, et al. Leaf and root endospheres  
723 harbor lower fungal diversity and less complex fungal co-occurrence patterns than  
724 rhizosphere. *Frontiers in microbiology*. 2019;10:1015.
- 725

## Appendix . figures

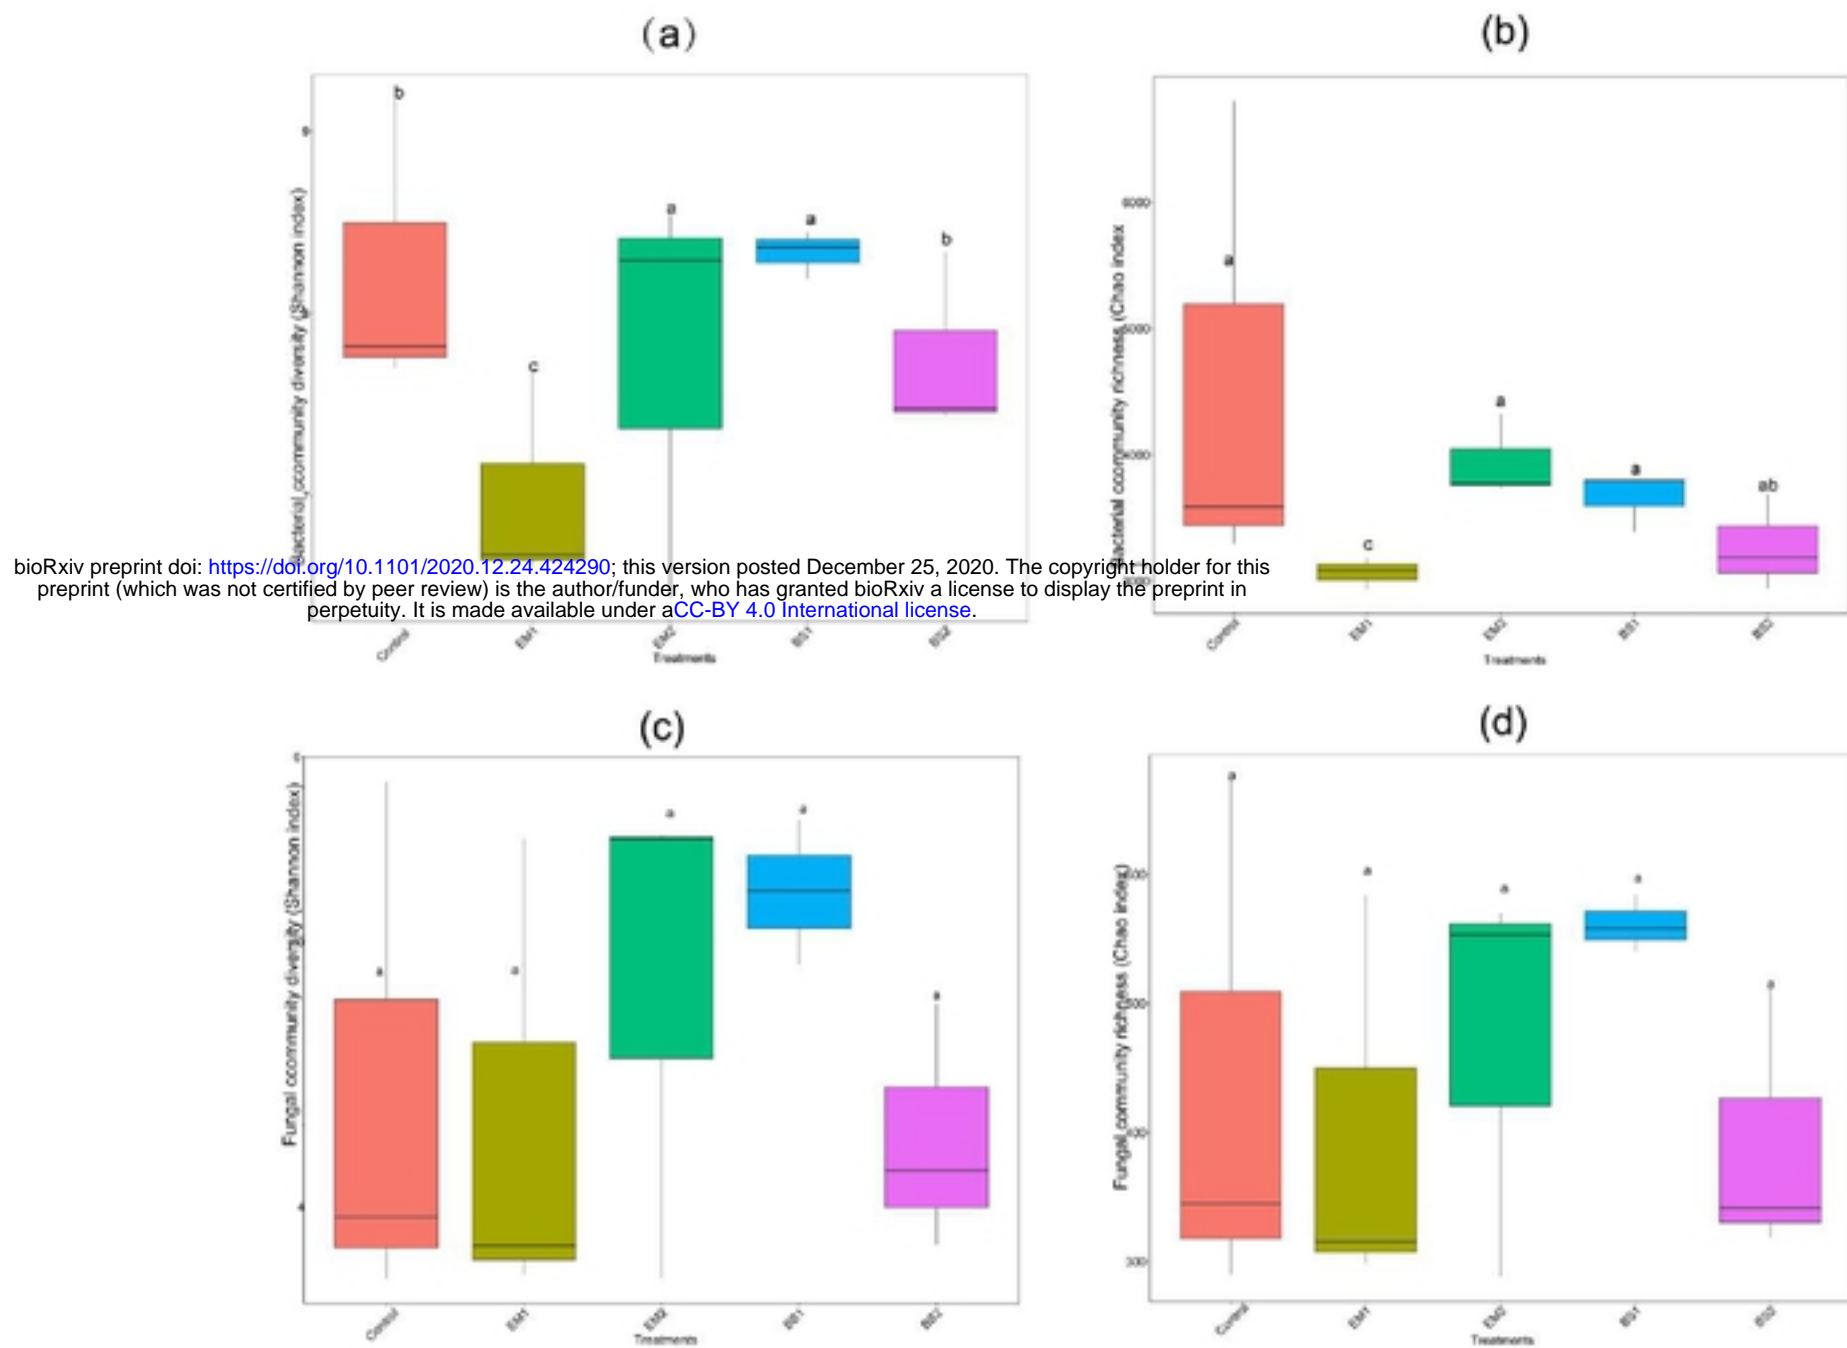

Fig 1. Comparative analysis of the alpha diversity index in different treated soils: (a) Shannon of bacterial 16S rRNA gene, (b) Chao of bacterial 16S rRNA gene, (c) Shannon of fungal ITS gene, (d) Chao of fungal ITS gene, were calculated by five treatments. Statistically significant differences were determined by one-way ANOVA ( $P < 0.05$ ).



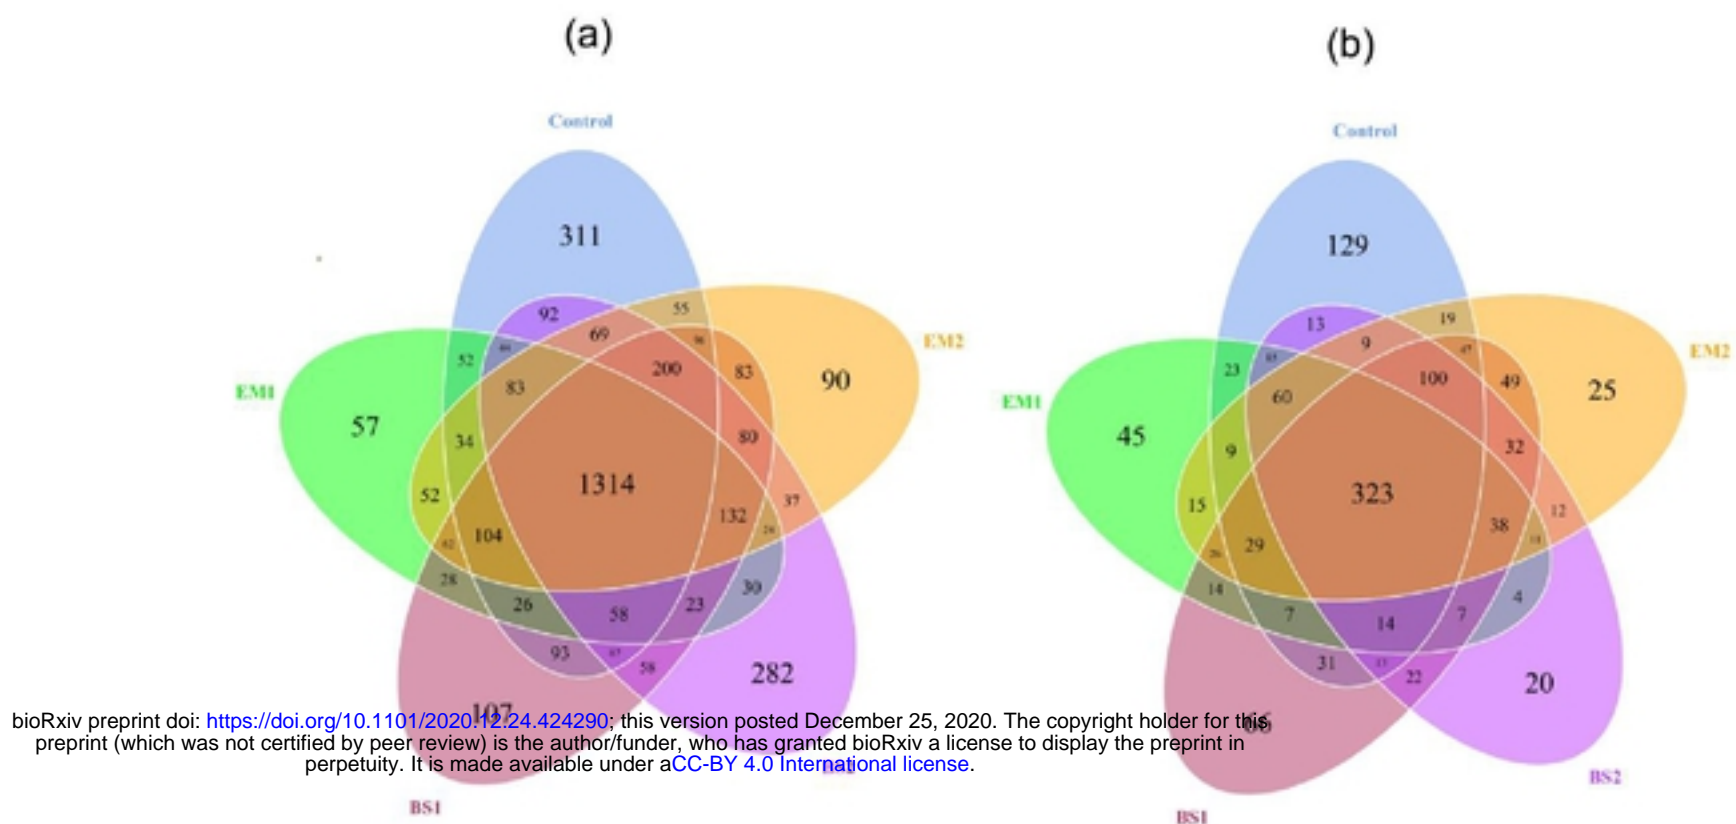

**Fig 2.** Venn diagram showing the unique and shared bacterial OTUs (3% distance level) among the different libraries in CK (pink), EM1 (green), EM2(blue), BS1(red) and BS2 (yellow) treatments: (a) Venn diagram of bacterial OTUs between five treatments; (b) Venn diagram of fungal OTUs between five treatments. The numbers in one circle denote unique OTUs, and numbers in two or more intersecting circles denote shared OTUs.

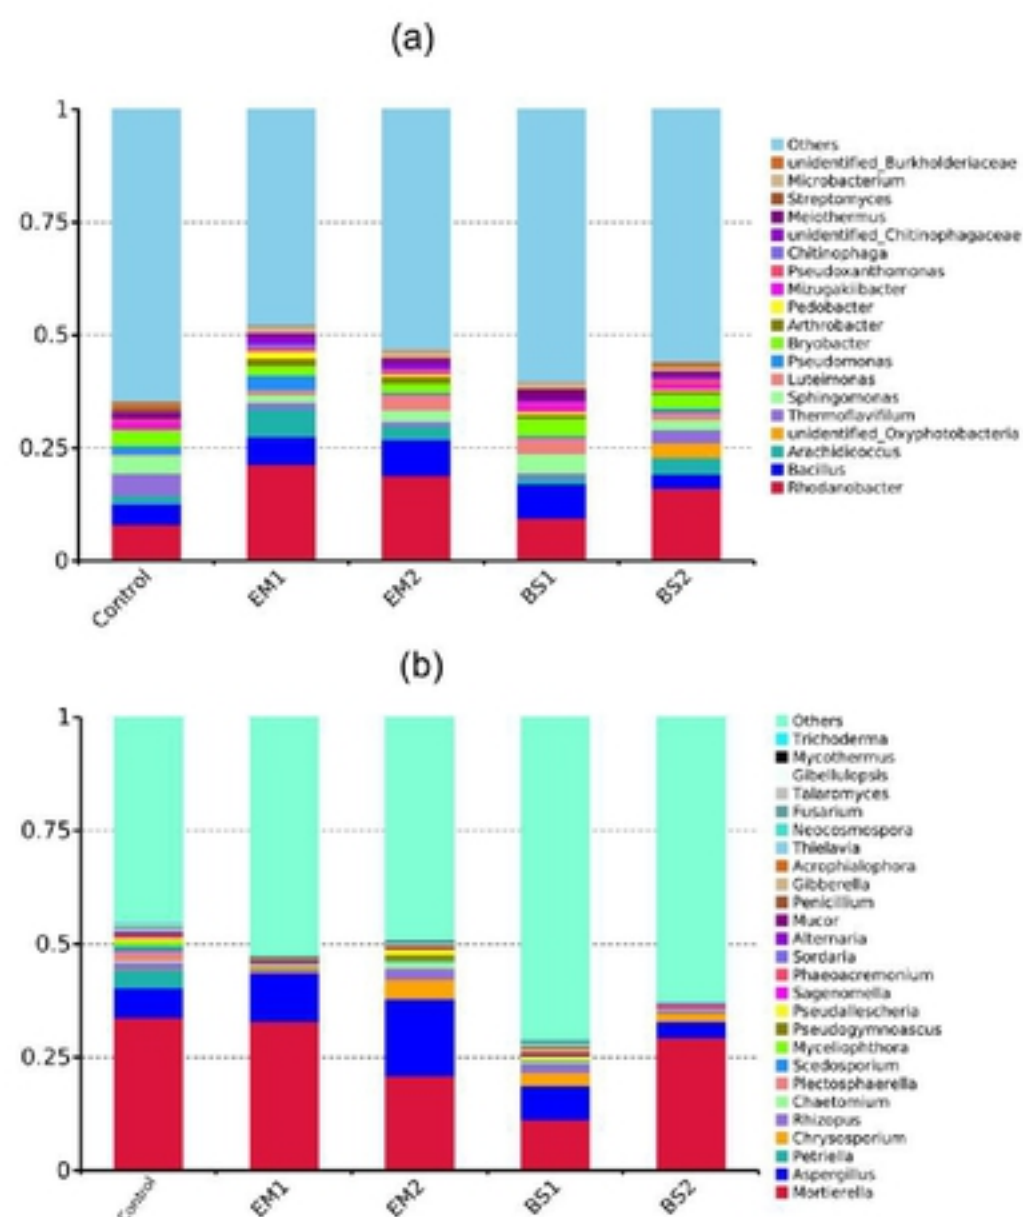

Fig 3. Changes in the relative abundances of bacterial (a) and fungal (b) dominant genera(b) under different treatments of strawberry soil, proportional distribution of taxa with abundance >1%. Different letters represent statistical significance at P <0.05.

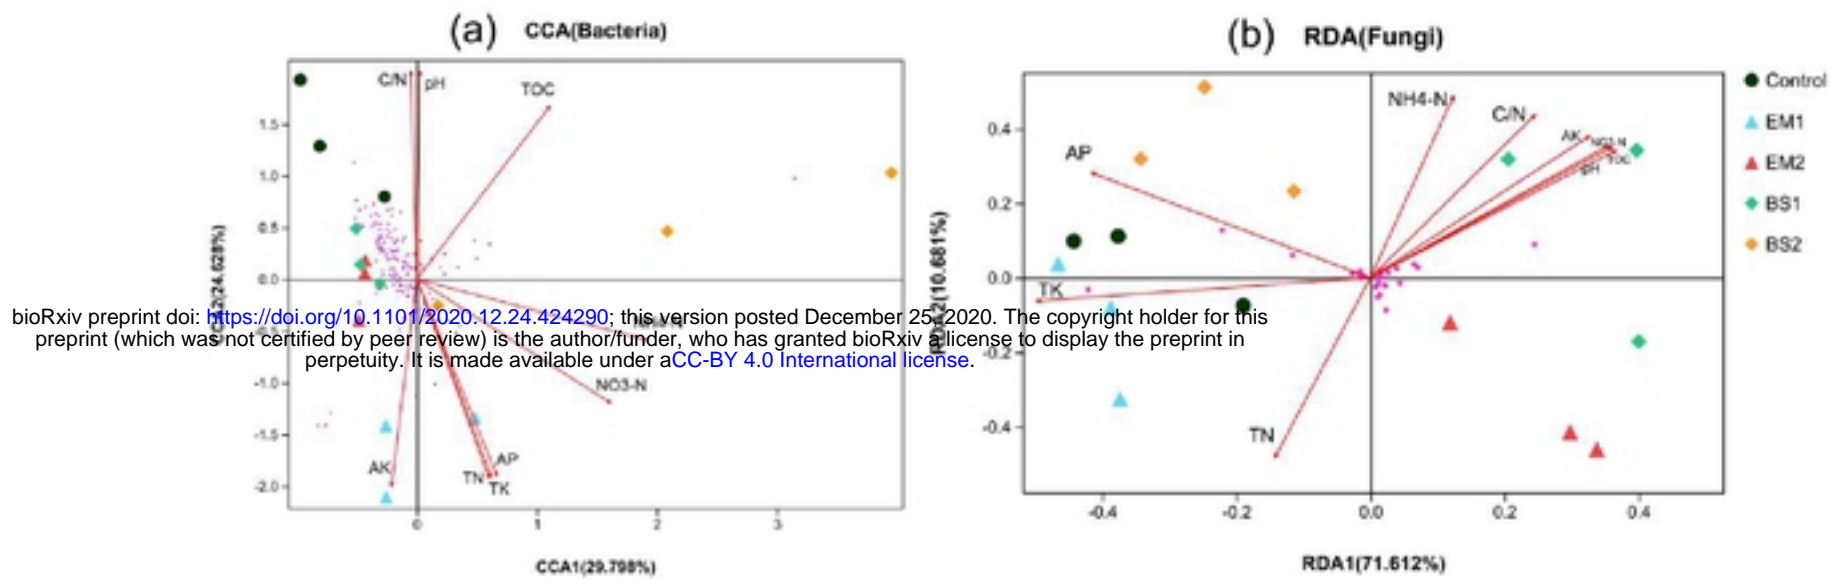

bioRxiv preprint doi: <https://doi.org/10.1101/2020.12.24.424290>; this version posted December 25, 2020. The copyright holder for this preprint (which was not certified by peer review) is the author/funder, who has granted bioRxiv a license to display the preprint in perpetuity. It is made available under aCC-BY 4.0 International license.

Fig 4. RDA and CCA demonstrating the relationships between soil environmental factors and soil microbial communities(bacterial (a), fungal (b)) after application of soil amendments. The soil microbial communities selected the abundant OTUs represented by more than 0.5% relative abundance. The length of each arrow indicates the contribution of the corresponding parameters to the structural variation. The treatments are indicated in different colors respectively. Soil factors indicated in blue text include total carbon (TOC), total nitrogen (TN), total phosphorus(TP),  $\text{NH}_4^+\text{-N}$ ,  $\text{NO}_3^-\text{-N}$ , pH, Total potassium(TK), Available potassium(AK), Available phosphorus(AP).

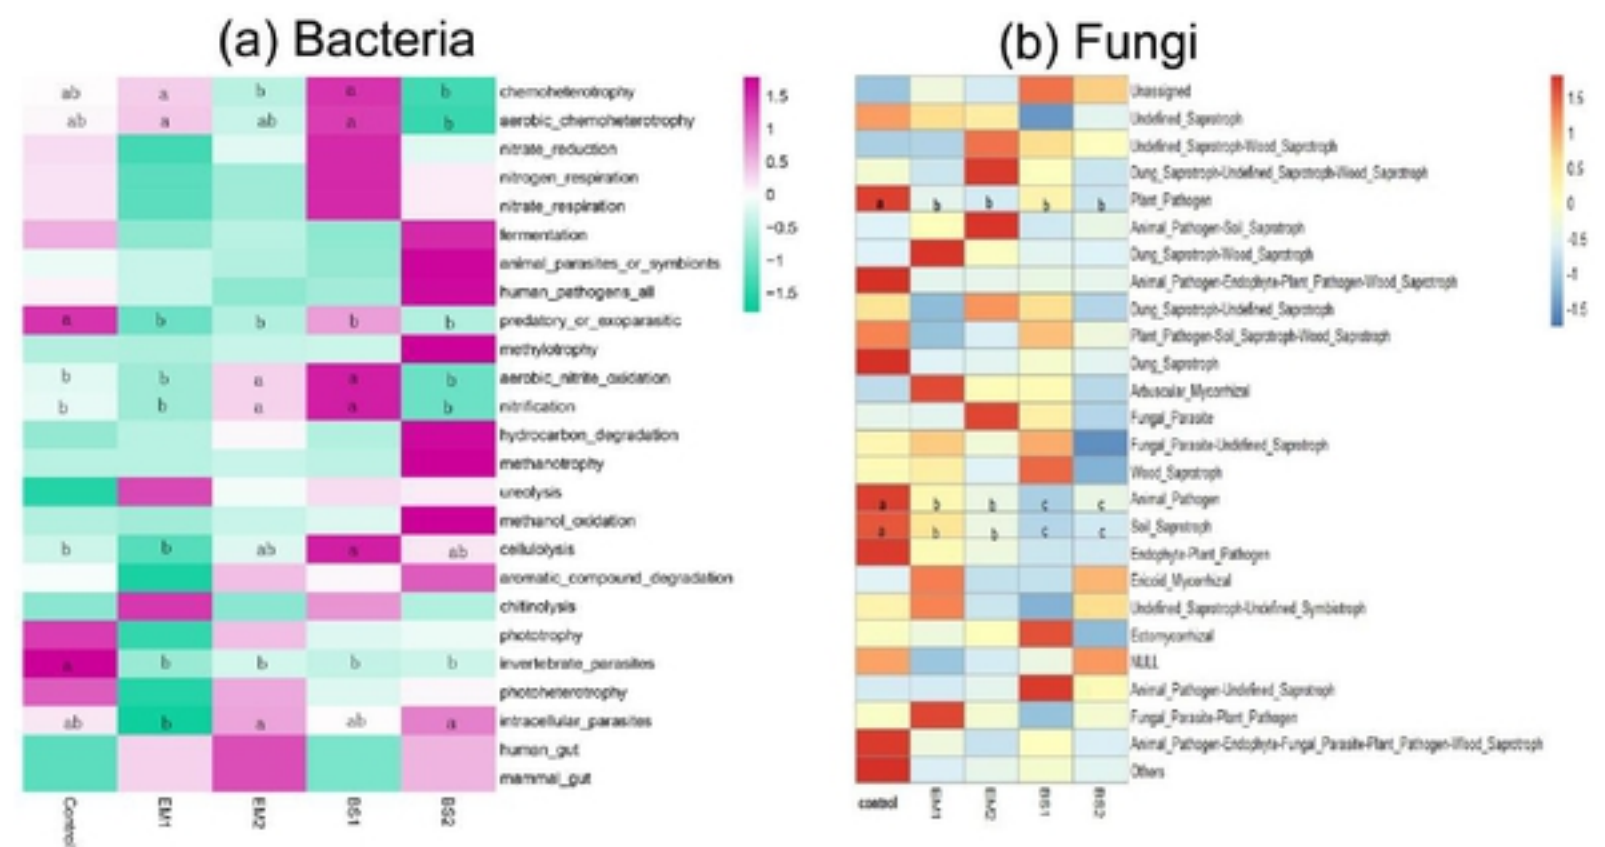

Fig 5. Heatmap showing relative functional abundance predictions of the bacterial communities

based on FAPROTAX (a), and fungal communities based on FUNGuild (b). The color code represents the row z-score. Different letters (a, b, ab, c) represent statistical significance at  $P < 0.05$ .

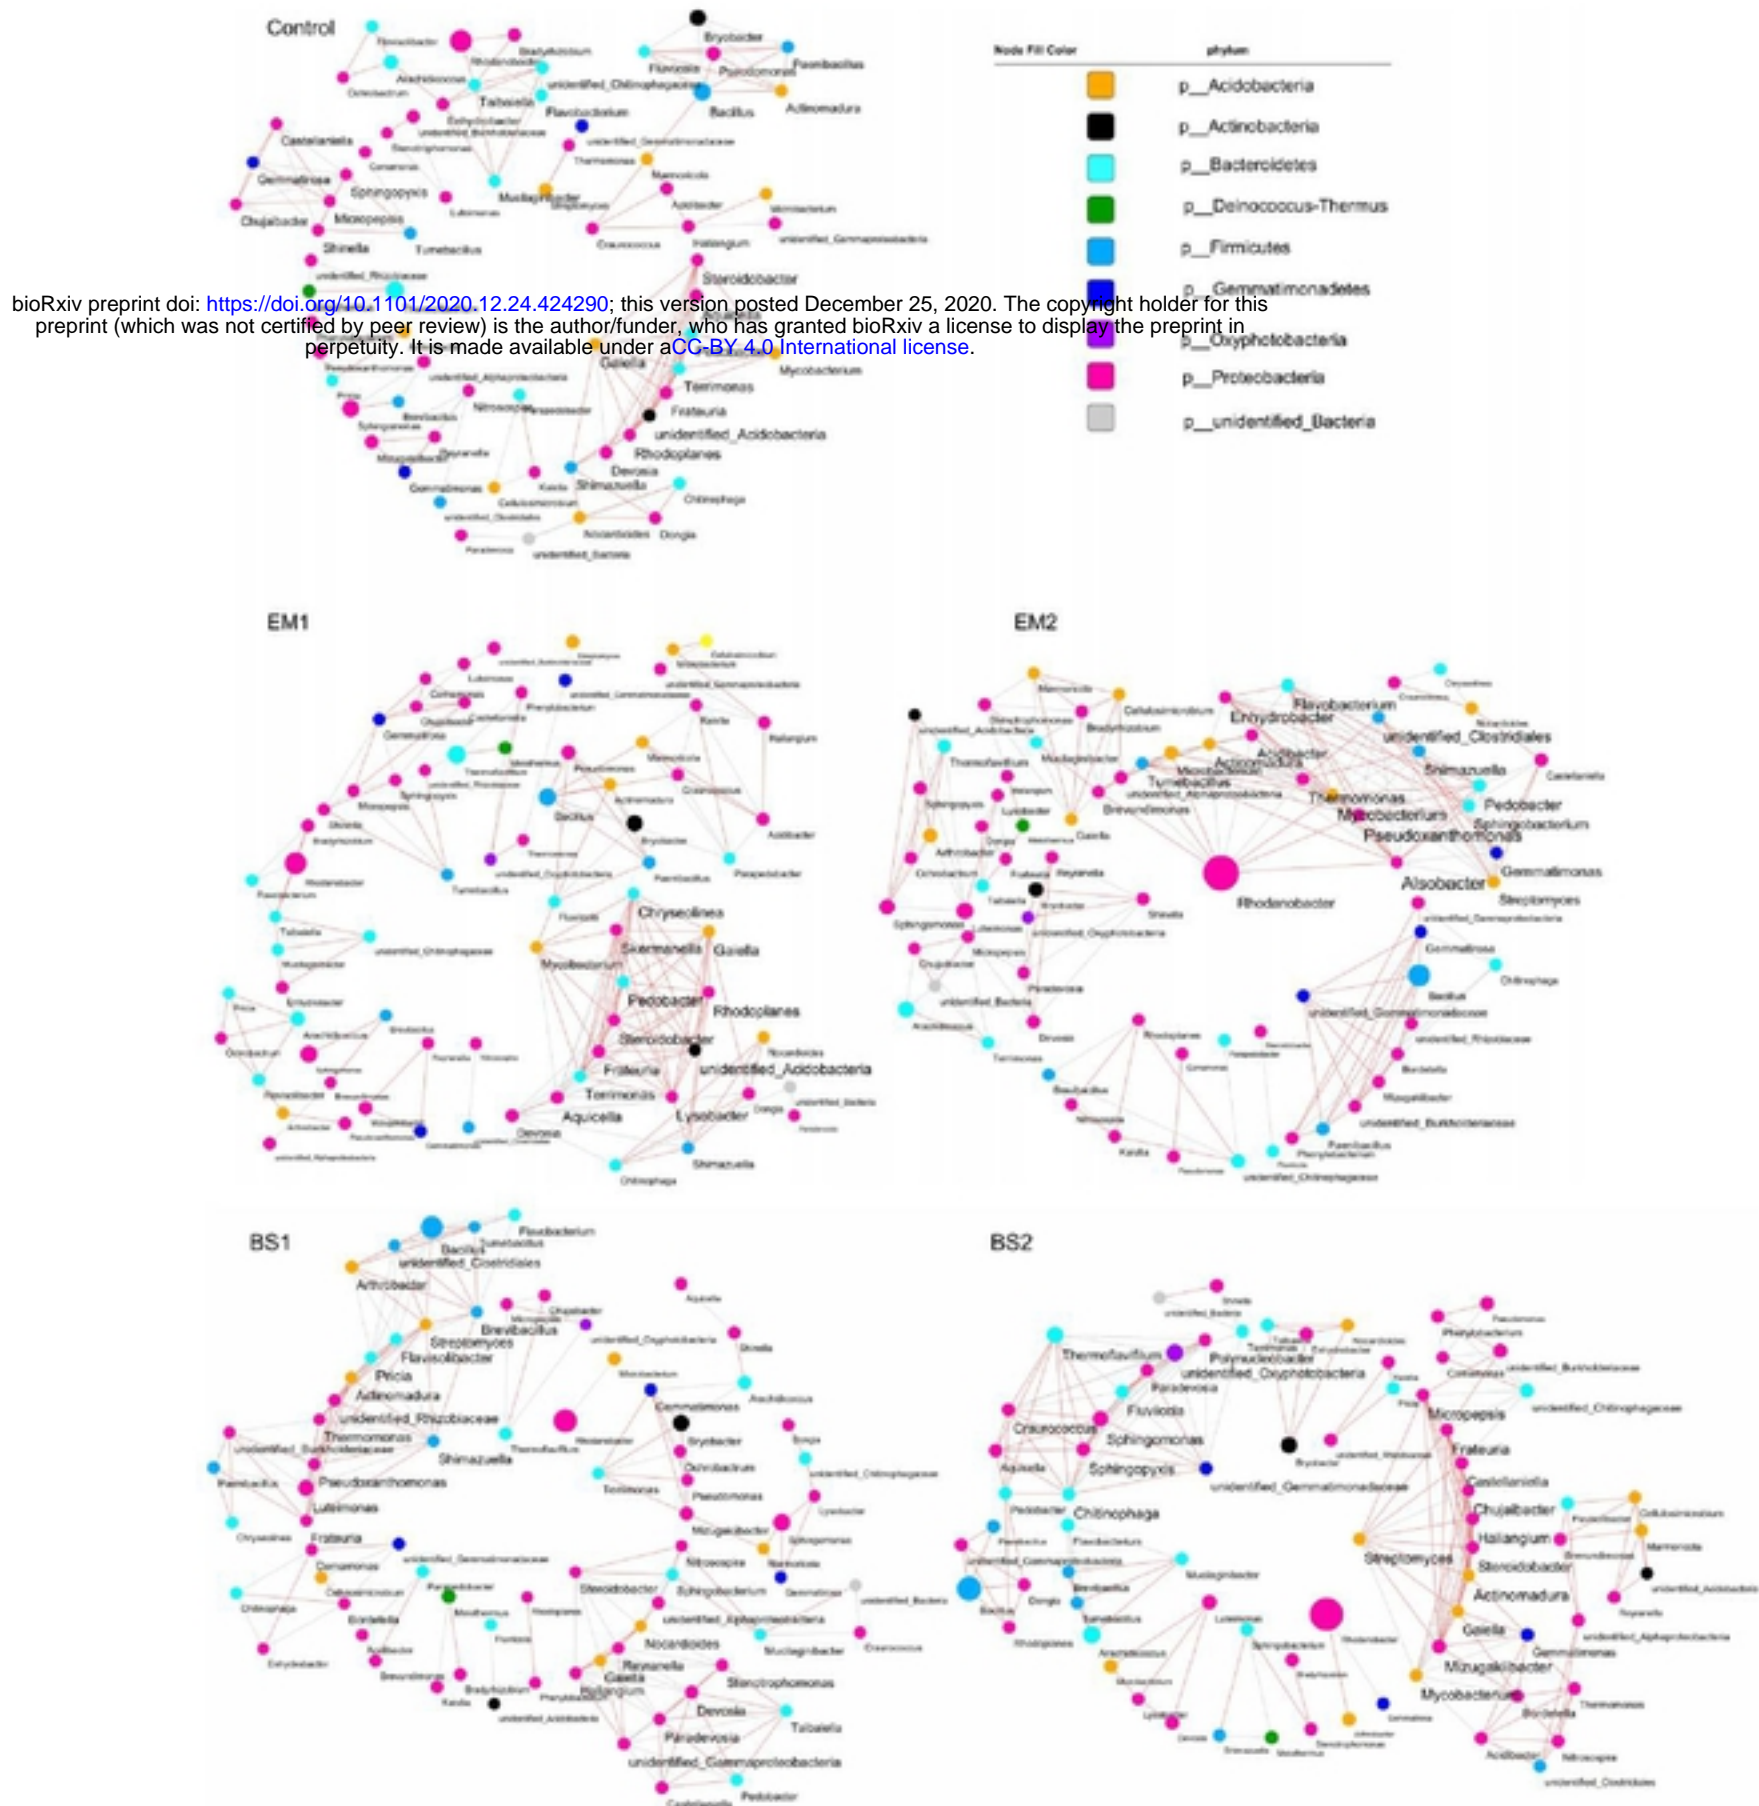

Fig 6. Co-occurrence network diagram of soil bacterial communities at genus level between different treatments. Based on Spearman correlation, Cytoscape was used to construct bacterial co-occurrence network. Correlation is shown as edge (positive correlation = gray; Negative correlation = light red), correlation coefficient  $r > |0.8|$ , and  $P < 0.05$ . The size of nodes is positively correlated with relative abundance of genus, and the color of nodes is distinguished by phylum

level.

bioRxiv preprint doi: <https://doi.org/10.1101/2020.12.24.424290>; this version posted December 25, 2020. The copyright holder for this preprint (which was not certified by peer review) is the author/funder, who has granted bioRxiv a license to display the preprint in perpetuity. It is made available under a [CC-BY 4.0 International license](#).

Table. 1 Topological properties of of Correlation network diagram of soil bacterial communities at genus level in different treatments.

| Parameters             | Control  | EM1       | EM2       | BS1      | BS2       |
|------------------------|----------|-----------|-----------|----------|-----------|
| nodes                  | 70       | 74        | 74        | 74       | 73        |
| Total links            | 139      | 200       | 216       | 184      | 191       |
| Positive links         | 84       | 131       | 107       | 95       | 133       |
| Negative links         | 55       | 69        | 109       | 89       | 58        |
| Clustering coefficient | 0.798    | 0.584     | 0.700     | 0.683    | 0.731     |
| Network density        | 0.058    | 0.064     | 0.080     | 0.068    | 0.073     |
| Shortest paths         | 580(12%) | 1604(29%) | 1976(36%) | 918(16%) | 1268(24%) |
| Network diameter       | 6        | 13        | 15        | 9        | 10        |
| Average neighbors      | 3.971    | 4.676     | 5.838     | 4.973    | 5.233     |

bioRxiv preprint doi: <https://doi.org/10.1101/2020.12.24.424290>; this version posted December 25, 2020. The copyright holder for this preprint (which was not certified by peer review) is the author/funder, who has granted bioRxiv a license to display the preprint in perpetuity. It is made available under aCC-BY 4.0 International license.
